# Supplementary material for: Drug prescribing and dispensing practices in regional and national referral hospitals of Eritrea: Evaluation with WHO/INRUD core drug use indicators
Source: PubMed Central journal article supplement (PMC9390936; doi:10.1371/journal.pone.0272936), 2022-08-19
Supplement: pone.0272936.s001.pdf [file pone.0272936.s001.pdf]

## Prescribing indicator recording form

Location: \_\_\_\_\_

Investigator: \_\_\_\_\_

Date: \_\_\_\_\_

| Seq. #    | Type                 | Date prescription was written | Age (yrs.) | # of Drugs prescribed | # of Generics | Presence of Antibiotic (0/1)* | Presence of Injection (0/1)* | # of drugs on ENLM | Diagnosis |
|-----------|----------------------|-------------------------------|------------|-----------------------|---------------|-------------------------------|------------------------------|--------------------|-----------|
| 1.        | <b>Retrospective</b> |                               |            |                       |               |                               |                              |                    |           |
| 2.        |                      |                               |            |                       |               |                               |                              |                    |           |
| 3.        |                      |                               |            |                       |               |                               |                              |                    |           |
| 4.        |                      |                               |            |                       |               |                               |                              |                    |           |
| 5.        |                      |                               |            |                       |               |                               |                              |                    |           |
| 6.        |                      |                               |            |                       |               |                               |                              |                    |           |
| 7.        |                      |                               |            |                       |               |                               |                              |                    |           |
| 8.        |                      |                               |            |                       |               |                               |                              |                    |           |
| 9.        |                      |                               |            |                       |               |                               |                              |                    |           |
| 10.       |                      |                               |            |                       |               |                               |                              |                    |           |
| 11.       |                      |                               |            |                       |               |                               |                              |                    |           |
| 12.       |                      |                               |            |                       |               |                               |                              |                    |           |
| 13.       |                      |                               |            |                       |               |                               |                              |                    |           |
| 14.       |                      |                               |            |                       |               |                               |                              |                    |           |
| 15.       |                      |                               |            |                       |               |                               |                              |                    |           |
| 16.       |                      |                               |            |                       |               |                               |                              |                    |           |
| 17.       |                      |                               |            |                       |               |                               |                              |                    |           |
| 18.       |                      |                               |            |                       |               |                               |                              |                    |           |
| 19.       |                      |                               |            |                       |               |                               |                              |                    |           |
| 20.       |                      |                               |            |                       |               |                               |                              |                    |           |
| 21.       |                      |                               |            |                       |               |                               |                              |                    |           |
| 22.       |                      |                               |            |                       |               |                               |                              |                    |           |
| 23.       |                      |                               |            |                       |               |                               |                              |                    |           |
| 24.       |                      |                               |            |                       |               |                               |                              |                    |           |
| 25.       |                      |                               |            |                       |               |                               |                              |                    |           |
| 26.       |                      |                               |            |                       |               |                               |                              |                    |           |
| 27.       |                      |                               |            |                       |               |                               |                              |                    |           |
| 28.       |                      |                               |            |                       |               |                               |                              |                    |           |
| 29.       |                      |                               |            |                       |               |                               |                              |                    |           |
| 30.       |                      |                               |            |                       |               |                               |                              |                    |           |
| 31.       |                      |                               |            |                       |               |                               |                              |                    |           |
| 32.       |                      |                               |            |                       |               |                               |                              |                    |           |
| 33.       |                      |                               |            |                       |               |                               |                              |                    |           |
| 34.       |                      |                               |            |                       |               |                               |                              |                    |           |
| 35.       |                      |                               |            |                       |               |                               |                              |                    |           |
| Sub total |                      |                               |            |                       |               |                               |                              |                    |           |

\* 0 = No \*1= Yes

## Detailed Prescribing Encounter Form

**Location:** \_\_\_\_\_

**Investigator:** \_\_\_\_\_ **Date:** \_\_\_\_\_

| ID #                     | Date                                                | Name | Age      | Sex        | Prescriber  |
|--------------------------|-----------------------------------------------------|------|----------|------------|-------------|
|                          |                                                     |      |          |            |             |
| Health Problems          | <b>Health Problem Description (Chief complaint)</b> |      |          |            |             |
|                          | 1.                                                  |      |          |            |             |
|                          | 2.                                                  |      |          |            |             |
|                          | 3.                                                  |      |          |            |             |
| Drugs                    | Name and Strength                                   |      | Quantity | Unit price | Total price |
|                          | 1.                                                  |      |          |            |             |
|                          | 2.                                                  |      |          |            |             |
|                          | 3.                                                  |      |          |            |             |
|                          | 4.                                                  |      |          |            |             |
|                          | 5.                                                  |      |          |            |             |
| <b>Grand total price</b> |                                                     |      |          |            |             |
