# Supplementary material for: Drug prescribing and dispensing practices in regional and national referral hospitals of Eritrea: Evaluation with WHO/INRUD core drug use indicators
Source: PubMed Central journal article supplement (PMC9390936; doi:10.1371/journal.pone.0272936), 2022-08-19
Supplement: pone.0272936.s002.pdf [file pone.0272936.s002.pdf]

## Patient indicator recording form

**Location:** \_\_\_\_\_

**Investigator:** \_\_\_\_\_

**Date:** \_\_\_\_\_

| Seq. #            | Patient identifier (Sex) | Consulting Time (mins) | Dispensing Time (secs) | # of Drugs Prescribed | # of Drugs actually Dispensed | # of drugs Adequately Labelled | Patient Knows Correct Dosages (0/1)* |
|-------------------|--------------------------|------------------------|------------------------|-----------------------|-------------------------------|--------------------------------|--------------------------------------|
| 1                 |                          |                        |                        |                       |                               |                                |                                      |
| 2                 |                          |                        |                        |                       |                               |                                |                                      |
| 3                 |                          |                        |                        |                       |                               |                                |                                      |
| 4                 |                          |                        |                        |                       |                               |                                |                                      |
| 5                 |                          |                        |                        |                       |                               |                                |                                      |
| 6                 |                          |                        |                        |                       |                               |                                |                                      |
| 7                 |                          |                        |                        |                       |                               |                                |                                      |
| 8                 |                          |                        |                        |                       |                               |                                |                                      |
| 9                 |                          |                        |                        |                       |                               |                                |                                      |
| 10                |                          |                        |                        |                       |                               |                                |                                      |
| 11                |                          |                        |                        |                       |                               |                                |                                      |
| 12                |                          |                        |                        |                       |                               |                                |                                      |
| 13                |                          |                        |                        |                       |                               |                                |                                      |
| 14                |                          |                        |                        |                       |                               |                                |                                      |
| 15                |                          |                        |                        |                       |                               |                                |                                      |
| 16                |                          |                        |                        |                       |                               |                                |                                      |
| 17                |                          |                        |                        |                       |                               |                                |                                      |
| 18                |                          |                        |                        |                       |                               |                                |                                      |
| 19                |                          |                        |                        |                       |                               |                                |                                      |
| 20                |                          |                        |                        |                       |                               |                                |                                      |
| 21                |                          |                        |                        |                       |                               |                                |                                      |
| 22                |                          |                        |                        |                       |                               |                                |                                      |
| 23                |                          |                        |                        |                       |                               |                                |                                      |
| 24                |                          |                        |                        |                       |                               |                                |                                      |
| 25                |                          |                        |                        |                       |                               |                                |                                      |
| 26                |                          |                        |                        |                       |                               |                                |                                      |
| 27                |                          |                        |                        |                       |                               |                                |                                      |
| 28                |                          |                        |                        |                       |                               |                                |                                      |
| 29                |                          |                        |                        |                       |                               |                                |                                      |
| 30                |                          |                        |                        |                       |                               |                                |                                      |
| <b>Total</b>      |                          |                        |                        |                       |                               |                                |                                      |
| <b>Average</b>    |                          |                        |                        |                       |                               |                                |                                      |
| <b>Percentage</b> |                          |                        |                        |                       | _____ % of prescribed         | _____ % of dispensed           | _____ % of pts. know correct dosage  |

\* 0= No 1= Yes
