# Supplementary material for: Drug prescribing and dispensing practices in regional and national referral hospitals of Eritrea: Evaluation with WHO/INRUD core drug use indicators
Source: PubMed Central journal article supplement (PMC9390936; doi:10.1371/journal.pone.0272936), 2022-08-19
Supplement: pone.0272936.s003.pdf [file pone.0272936.s003.pdf]

## Facility Indicator Recording Form

**Location:** \_\_\_\_\_

**Investigator:** \_\_\_\_\_

**Date:** \_\_\_\_\_

| <b>Facility indicators</b>                             | <b>Results</b> |
|--------------------------------------------------------|----------------|
| Availability of Eritrean National Drug List (Yes/No)   |                |
| Availability of Eritrean National Formulary (Yes/No)   |                |
| Availability of Eritrean Treatment Guidelines (Yes/No) |                |
| Percentage availability of key indicator drugs (%)     |                |

**COMMENTS:**

---

---

---

---

---

---

**SIGNATURE:** \_\_\_\_\_
